# Supplementary material
Source: PubMed Central journal article supplement (PMC2982757)
Supplement: emboj2010233s1.pdf [file emboj2010233s1.pdf]

**Supplemental Material to:**

**Hen1 is required for oocyte development and piRNA stability in zebrafish**

Leonie M. Kamminga<sup>1,3</sup>, Maartje J. Luteijn<sup>1,3</sup>, Marjo J. den Broeder<sup>1</sup>, Stefan Redl<sup>2</sup>,  
Lucas J.T. Kaaij<sup>1</sup>, Elke F. Roovers<sup>1</sup>, Peter Ladurner<sup>2</sup>, Eugene Berezikov<sup>1</sup> and René F.  
Ketting<sup>1,4</sup>

<sup>1</sup>Hubrecht Institute-KNAW & University Medical Centre Utrecht, Uppsalalaan 8,  
3584 CT Utrecht, The Netherlands. <sup>2</sup>Institute of Zoology, Technikerstrasse 25, A-  
6020 Innsbruck, Austria

<sup>3</sup>Contributed equally to the work

<sup>4</sup>Correspondence: r.ketting@hubrecht.eu

Running title: Hen1 function in zebrafish germ cells

Key words: piRNA/Piwi/Hen1/zebrafish/germ line

## Oligonucleotide sequences used in this work:

### Genotyping

Hen1\_exon5\_F AGGAAACAGCTATGACCATGAAAG AGGCAATGAAAGTACATC  
Hen1\_intron5/6 TGAAAACGACGGCCAGTGAT TTAGGGAATGCAATTT ACC

### Hen1 RT-PCR

RT\_exon5\_6\_F1 ACAGACTGCTATACAGGGTGGTG  
RT\_exon6\_R TAAGCGCACTTCCATCAGC  
RT\_exon1\_2\_F2 CCGACCTAGAAAGGTCATCG  
RT\_exon 3\_4\_R2 TGTTTCGATCAGCTCAACACAT  
GAPDH\_F acagttgtaagcaatgcctct  
GAPDH\_R tatcccagaattcctttcatgg

### Constructs for RNA injection, using MultiSite Gateway® cloning technology (Invitrogen)

#### *GFP:Hen1FL*

FL\_3'\_Fw GGGGACAGCTTTCTTGTACAAAGTGG ccacc Acc gcc aca ccg ttc tc  
FL/nos\_F GGGGACAGCTTTCTTGTACAAAGTGGccaccCATCTGAGGCAGCAATGG  
NosUTR\_3'\_R GGGGACAACCTTTGTATAATAAAGTTGGAAAATGTTTATATTTTCCTCAC

#### *GFP: Hen1MTD*

MTD\_3'\_Fw GGGGACAGCTTTCTTGTACAAAGTGG ccacc Acc gcc aca ccg ttc tc  
MTD/nos\_F cagattgcagtggtccagagaGAGCGGACATTGATGCTC  
NosUTR\_3'\_R GGGGACAACCTTTGTATAATAAAGTTG GAAAATGTTTATATTTTCCTCAC

#### *GFP: Hen1CTD*

Hen1\_CTD\_F ggtagctatggagacgaa GAGCGGACATTGATGCTC  
CTD/nos\_3'\_F GGGGACAGCTTTCTTGTACAAAGTGGccaccCATCTGAGGCAGCAATGG  
NosUTR\_3'\_R GGGGACAACCTTTGTATAATAAAGTTGGAAAATGTTTATATTTTCCTCAC

#### *Hen1FL:GFP*

FL\_5'\_F GGGGACAAGTTTGTACAAAAAAGCAGGCTCCACCATGACCGCCACACCGTTCTC  
FL\_5'\_R GGGGACCACTTTGTACAAGAAAGCTGGGTGTTTCGTCTCCATAGCTACCAAG

### qRT-PCR

EnSpm\_F GATTGGCCATTGTGTTTAC ATGC  
EnSpm\_R GCTGTGACTGTCATAGGTTTACC  
I1\_F GAGTTGA GGATTGGAAGATCATT  
I-1\_R CTTGAGTTTTAGCAATAGAAAATCTAAA TC  
GypsyDR2\_F GAAATCACCTGTGCATTTAC  
GypsyDR2\_R ATGCAG ACATTGGGTAAAGC  
Ngaro1\_F GGGAGCGATCGAGACCTACC  
Ngaro1\_R CAATCATATCACGTGCTCCTCTCG  
Polinton-1\_F CCTGACAATGTT GTCAGCCTG  
Polinton-1\_R CATGAAAGCTAAGGGTATAACTCTG  
Ef1a\_F GGCCACGTCGACTCCGGAAAGTCC  
Ef1a\_R CTCAAACGAGCCT GGCTGTAAGG  
GAPDH\_F GTGGAGTCTACTGGTGTCTTC  
GAPDH\_R GTG CAGGAGGCATTGCTTACA  
Tubulin\_F CCTGCTGGGAACCTGTATTGT  
Tubulin\_R TCAATGAGTTCCTTGCCAAT

### Probes

piR28 5'-AGCCTCTGGAGCTGGTTGGCAT

|       |                           |
|-------|---------------------------|
| piR30 | 5'-TGGACGAAAAGATTCGCTGGCA |
| piR31 | 5'-GCATGTGGCTCTGTGTT      |
| piR80 | 5'-TCGTCGCGGAGCAGCCCAT    |
| let-7 | 5'-AACTATACAACCTACTACTCA  |

### Primers *in situ* probes

|                          |                                                |
|--------------------------|------------------------------------------------|
| F_vasa probe             | GGTAGCTCATGGAAAATGACTGGTGATTCGTTTCAG           |
| R_vasa probe             | CGGTAATACGACTCACTATAGGGCTCAGTGAGTCACAAAGTC     |
| TUT1_Exon5/6_Fw          | AACAACAAGGTGGCGATGA                            |
| TUT1_Exon7/8_T7_Rev      | CAGGtaatacgaactcactataggTGCAACAGTTTTTCTAACGTG  |
| TUT2_RT_exon7_8_Fw       | GGACAGAATCAGTGGAGTGGA                          |
| TUT2_RT_exon11_12_T7_Rev | CAGG taatacgaactcactatagg GCTTGTCCCATTTGAAAACA |
| TUT4_exon5/6_Fw          | cccgcttacaagagattttga                          |
| TUT4_exon8/9_T7_Rev      | CAGGtaatacgaactcactatagggaagttggtcattttgcgaga  |
| TUT7_Exon24_25_Fw        | TTTCTCTAAAGTGTGTGATATTGGAGA                    |
| TUT7_27_28_T7_Rev        | CAGGtaatacgaactcactataggCTCAAGTCGAACGGATCCTC   |

### Primers mRNA expression of *dr tutases* in multiple tissues

|                            |                                                   |
|----------------------------|---------------------------------------------------|
| TUT1_Exon5/6_Fw            | AACAACAAGGTGGCGATGA                               |
| TUT1_Exon7/8_T7_Rev        | CAGGtaatacgaactcactataggTGCAACAGTTTTTCTAACGTGTC   |
| TUT2_exon7_8_Fw            | GGACAGAATCAGTGGAGTGGA                             |
| TUT2_exon11_12_T7_Rev      | CAGGtaatacgaactcactataggGCTTGTCCCATTTGAAAACAG     |
| TUT3_Exon56_Fw             | CAAGCAGCAATATCCTGTGTT                             |
| TUT3_Exon8/9_T7_Rev        | CAGGtaatacgaactcactataggGCATTGCCCCATATGAACTT      |
| TUT4_Fw                    | aacagtcgtgtgcagcatct                              |
| TUT4_Rev                   | cagcatcctgtgtgtgct                                |
| TUT5_Exon6/7_Fw            | CAGTTTCTTACAGTTACACCCAAGA                         |
| TUT5_Exon8/9_T7_Rev        | CAGG taatacgaactcactatagg CCC AAA GTG CTG TCA CTG |
| TUT6_Fw                    | TCGTCTGTGAACACCTTTGGGCTT                          |
| TUT6_T7Rev                 | CAGG taatacgaactcactatagg                         |
| GTCGATACCTGAACACAACACTGCAG |                                                   |
| TUT7_Exon24_25_Fw          | TTTCTCTAAAGTGTGTGATATTGGAGA                       |
| TUT7_27_28_T7_Rev          | CAGG taatacgaactcactatagg CTCAAGTCGAACGGATCCTC    |

## Supplemental Figure legends

### **Figure S1.** Wild-type and *hen1* mutant gonads.

Gonads were dissected from *hen1* heterozygous or homozygous mutants, and stained for *vasa* mRNA to visualize germ cells. All pictures were taken at a 2.5x magnification.

### **Figure S2.** Beta-elimination analysis

(A) The left panel shows  $\beta$ -elimination on synthetic RNA with or without a 2' OMethyl group. RNA without modification is sensitive to  $\beta$ -elimination which results in a shift on gel, whereas RNAs with a 2'-methyl modification is no longer sensitive. The right panel shows the same treatments on piRNAs isolated from immunoprecipitation with Ziwi antibodies.

(B) Northern blots on total RNA isolated from the indicated genetic backgrounds, probed for the indicated piRNAs. Blots were done using both testis RNA and ovary derived RNA. *Hen1* mutant ovary RNA was isolated from the one female individual we retrieved.

### **Figure S3.** Cloned RNA species.

Bar diagram displaying the different types of RNA that were sequenced.

"Ligation" and "polyA" refer to the method used to tag the 3' end of the small RNAs for cloning purposes. "Other piRNA" refers to a class of piRNAs that map to regions of the genome for which there is no annotation.

### **Figure S4.** Ping-pong signatures.

Ping-pong signature of piRNAs cloned from wild-type and *hen1* mutant animals. First we asked for piRNAs that map to opposite strands of the same locus, then we asked how many bases their 5' ends were overlapping. Results are plotted as a percentage relative to the total number of overlapping piRNAs.

### **Figure S5.** Deep sequencing analysis.

(A) Length of A and U tails observed on piRNAs.

- (B) Scatter-plot of transposon read counts observed in wild-type and *hen1* mutant libraries. Each dot represents an individual transposon type.
- (C) Percentage uridylated piRNAs versus cloning frequency of piRNAs derived from retro-elements or DNA elements in *hen1* mutants. Retro-element-derived piRNAs are more frequently uridylated than piRNAs coming from DNA elements ( $10.0 \pm 1.7\%$  versus  $8.2 \pm 1.9\%$ ;  $p = 3 \times 10^{-9}$ ).
- (D) Similar plot as in S5B, but now focused only on transposons that have at least 3.000 reads in both libraries. The scale is now linear.

**Figure S6.** *dr tutase4* cDNA

This partially hypothetical open reading frame is based on XM\_002666528.1 and XM\_001335483.3. These two gene predictions fuse together as we determined through RT-PCR and sequencing. The fusion point between the two predictions is given in bold and the region we verified by sequencing is underlined.

**Figure S7.** Expression analysis of *dr tutases*

- (A) RT-PCR analysis on total RNA derived from various tissues using primers to amplify fragments from the transcripts of the indicated genes. For each gene a schematic drawing indicates the domain structure of the encoded proteins.
- (B) *In situ* hybridisations for *dr tutases1, 2, 4* and *7* on adult ovaries. Purple staining indicates mRNA expression.

| genotype | #♂  | #♀  |
|----------|-----|-----|
| +/+      | 108 | 136 |
| +/-      | 295 | 346 |
| -/-      | 296 | 1   |

**Table S1**

Sex ratios in offspring of *hen1* heterozygous animals

| Category         | Wild-type | hen1    |
|------------------|-----------|---------|
| miRNA            | 217847    | 416433  |
| Transposon piRNA | 2590397   | 3122019 |
| genic piRNA      | 430583    | 410056  |
| other piRNA      | 3899033   | 4133676 |
| rRNA             | 6801      | 14087   |
| snRNA            | 11091     | 18146   |
| snoRNA           | 389       | 708     |
| tRNA             | 29        | 36      |

TableS2. Deep-sequencing numbers

| <b>TUTase</b>  | <b>Accession number</b>          | <b># amino acids</b> | <b>Chromosomal position (Zv8)</b>                         | <b>Predicted or cDNA</b> |
|----------------|----------------------------------|----------------------|-----------------------------------------------------------|--------------------------|
| drTUTase1      | XM_687164.3                      | 580                  | Chr 12: 27,703,665-27,713,295                             | pred.                    |
| drTUTase2      | NM_001020600.1                   | 489                  | Chr5:53,398,137-53,412,679                                | cDNA                     |
| drTUTase3      | XM_692023.4                      | 653                  | Chr7:38,268,984-38,302,884                                | pred.                    |
| drTUTase4      | XM_002666528.1<br>XM_001335483.3 | 1445                 | Chr23: 38936010-38950932 (inverted segment of the genome) | pred.                    |
| drTUTase5      | XM_680973.3                      | 762                  | Chr19:26,790,880-26,801,515                               | pred.                    |
| U6<br>drTUTase | BC098614.1                       | 797                  | Chr12:11,013,190-11,027,473                               | cDNA                     |
| drTUTase7      | XM_685750.4                      | 1199                 | Chr5: 71874529 - 71919997                                 | pred.                    |

Table S4. TUTases in the zebrafish.

Predicted indicates computationally identified transcripts based on homologies with ESTS from both zebrafish itself and other species. cDNA indicates a complete cDNA clone has been identified and sequenced.



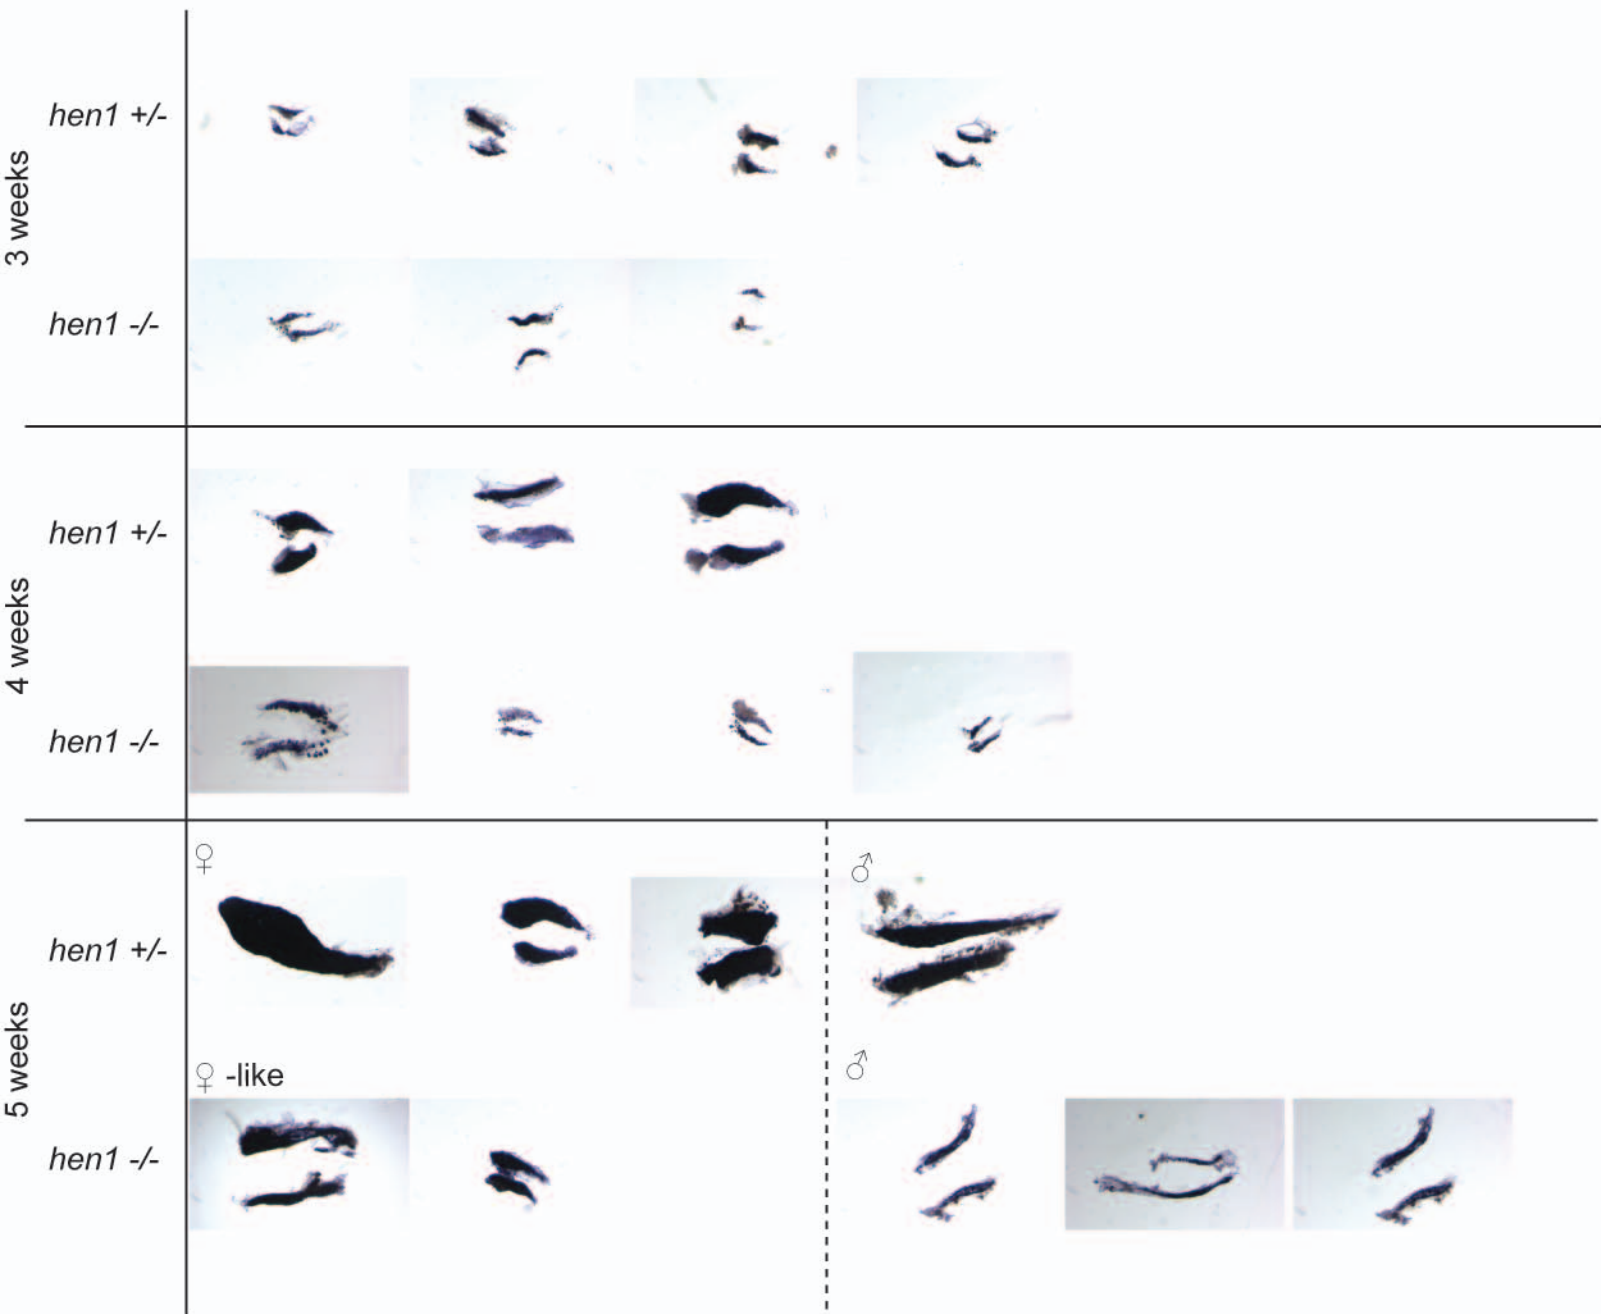

Kamminga\_Figure S1

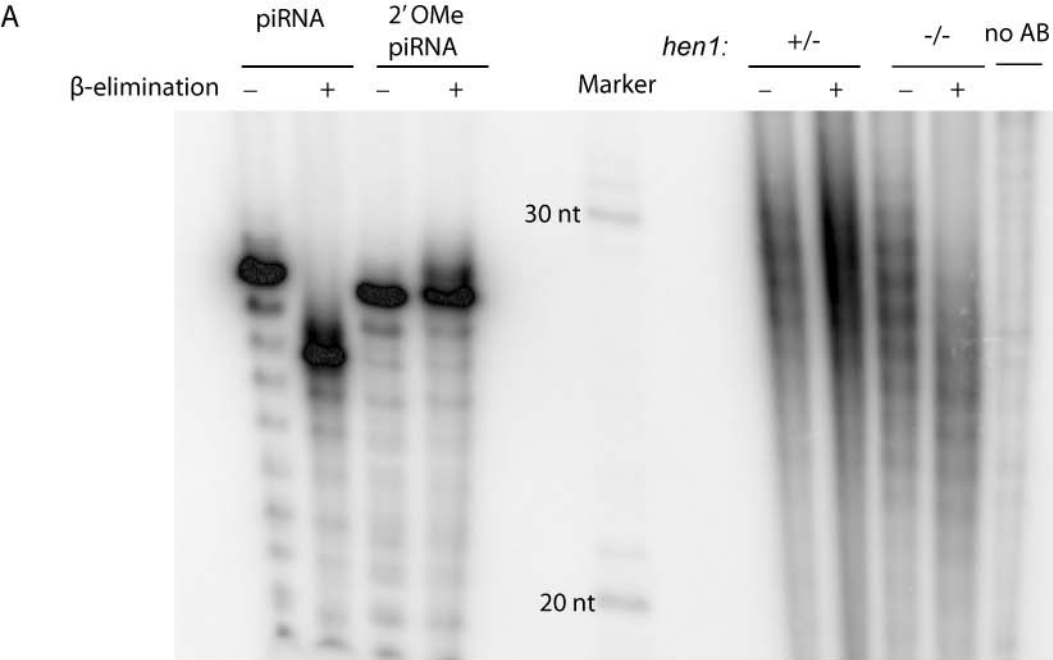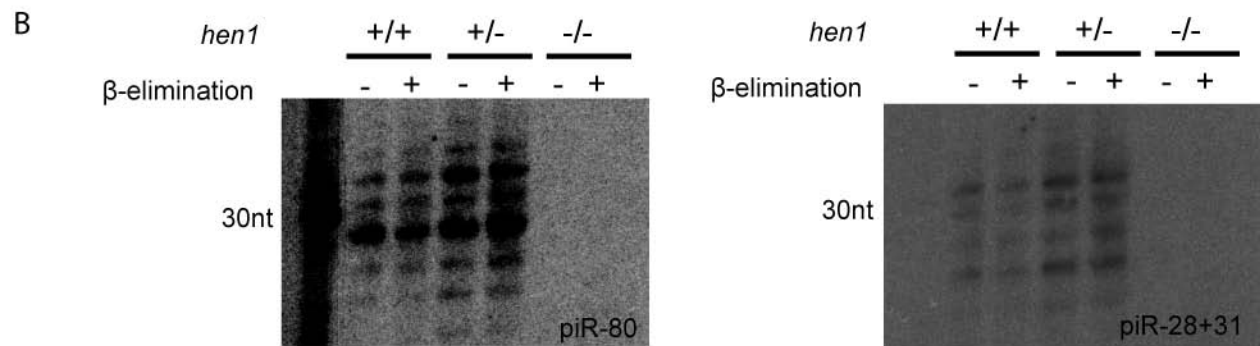

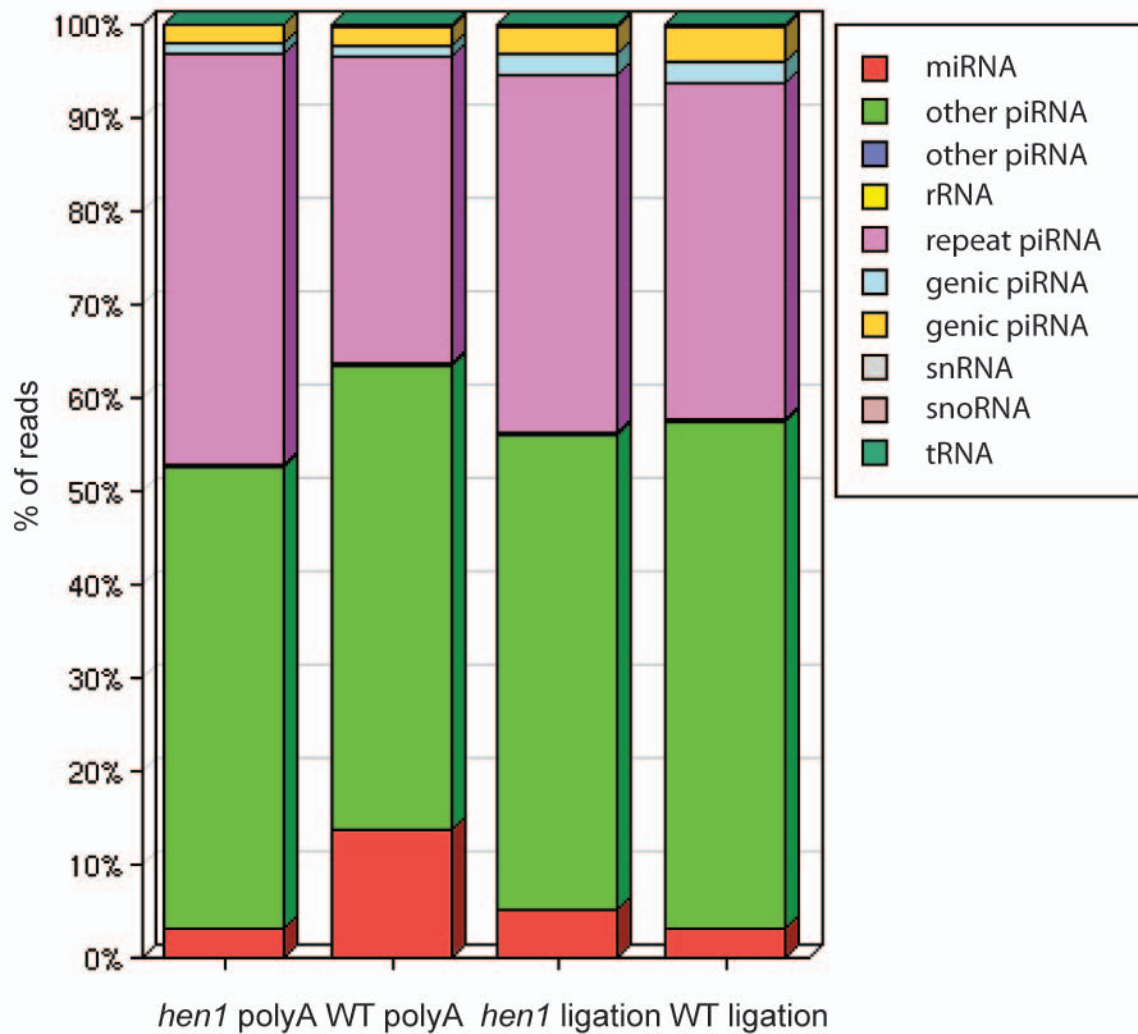

**Kamminga\_Figure S3**

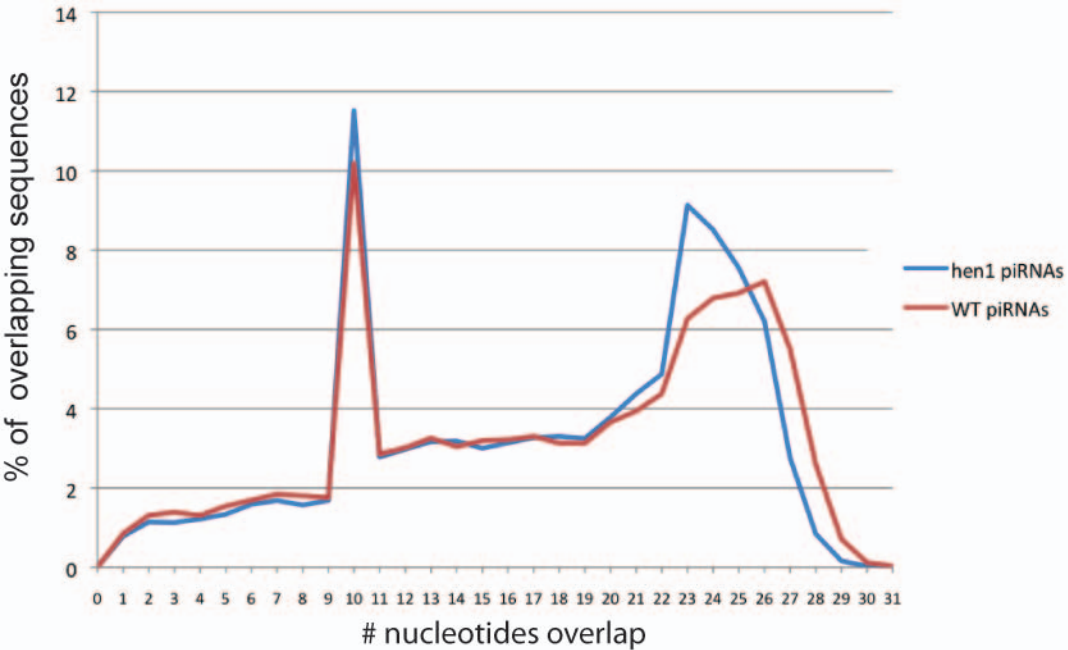

|                    | # of sequences showing overlap |
|--------------------|--------------------------------|
| <i>hen1</i> piRNAs | 317695.5                       |
| WT piRNAs          | 215079.7                       |

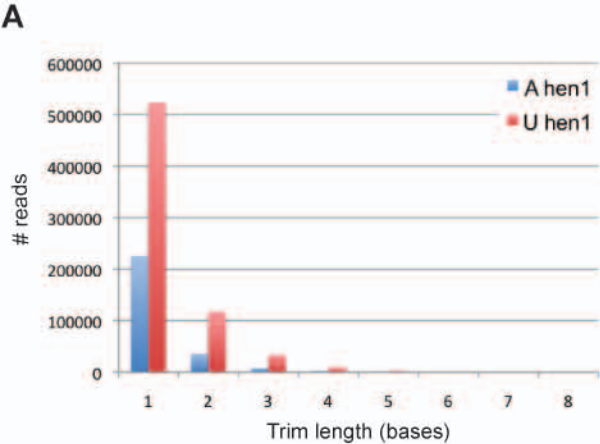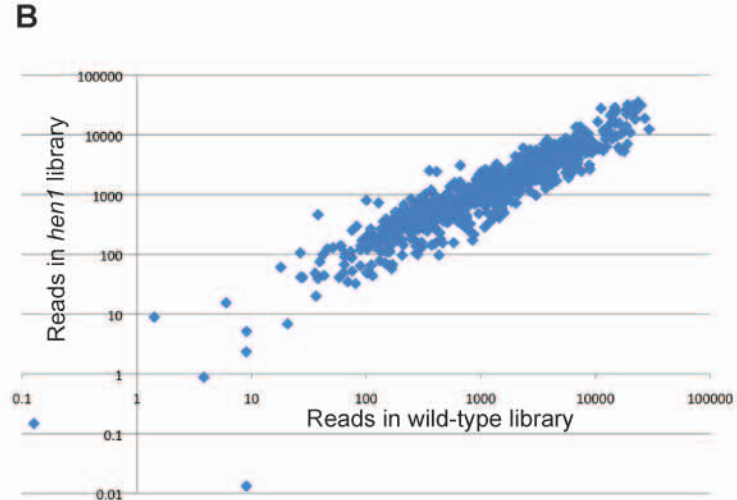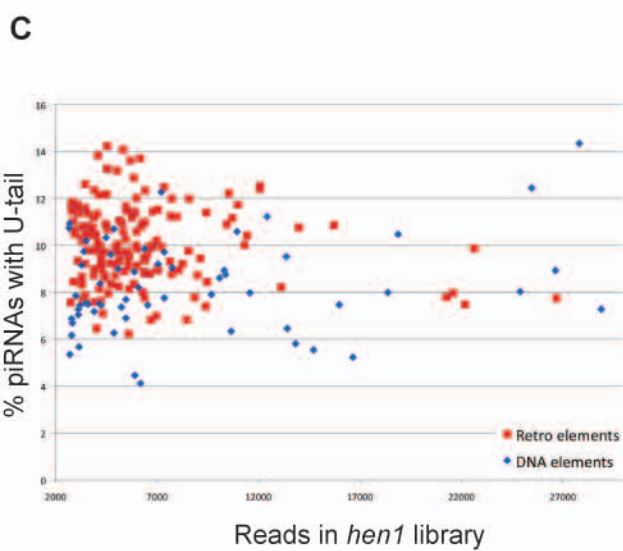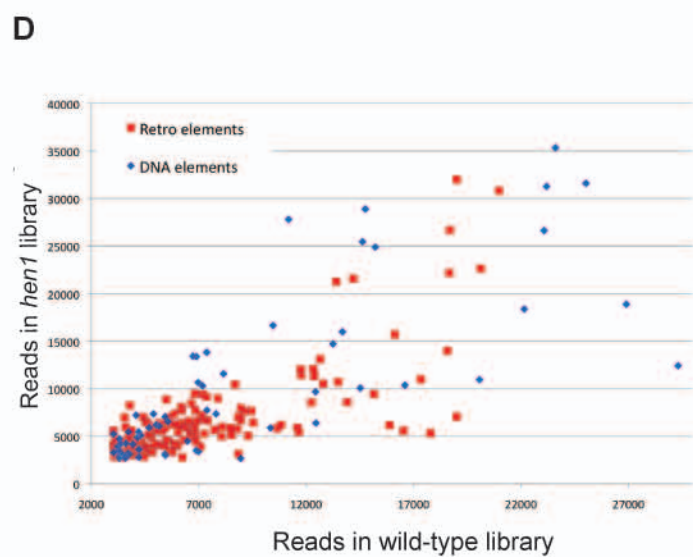

**ATG**gaggacccccaaaagcccagtgaggcactcaaaccttcccgtcgaatgctggcaaacgctcatcctccaaac  
ctcagaggagagcgtgaaaacccccagccgaagcaaacgcttgtcccagggtgaaggaaagggcgccggcg  
cagaacgcgaccgacagccctcaggagcaggccagggggaaaacccgcaggctaacaggcagaactaactctggt  
gaaagaggcaagggaaaccctcggcactgaagccgctcagcaaacacaagagaacaaaacagcggtcagaaca  
gaggaccgggtcaaatgaggagcaaacagcggaggaaagctcagcacacaacaataaacaccaccaccactaa  
agataagatgctggtgtggaggcgggagacagagggtggaggaggtggtggagggtgctgaatctgacctctgat  
cagcagctgggactcaaacaggcggaggagagactgcagagagactacatacaccggctgctcaagccgctccgg  
agtatcccaatctccagtatctatgcaaacgtgttccagtcgatgaggaaacatccaggggtctcacaagcacat  
taaagagaacgtcacaagaagaacatcatggagaacgggaggagaacgagttgagagcgtgctgctccctct  
ccagcacagttgaggcgttggacttcgagtggtggaggcagcagaactgcatggcatctcagaggaaagactttg  
cactgagcaggcgtgacttccggtggagggaattatacaaaaacaactagcagcgtgctctctccgctgta  
cggctcctgtctcaccgcttggcctcaaaaccagcagctgaacatcgacgtctcttatccctccactatgact  
cagcctgatgtgctcatcagggtgctggagatcctcaagaactgtgtggagtttgcagagggtgagctgatcttc  
atgccaaagtccctgttgtttctgcagagatgaggccagtggttaatgtgtaaagtgagcgcaggaaatgatgt  
cggctgctcactaccaatcacctcggcctgttccgactggagccgaggctcgttccctggttctggccttc  
gagctgaaagaactggcctcggcgcagactcgtatagaggatccggttgcactgaaaaggaaactgctgctctg  
tcattttcttctcgcagcagagatacaagccgcttctgctgtttataggacactggatcaaaaggcttcgaggt  
gaagcgtggtgatgaatctcatctgaccggtgtgcagctcaggtgtttgtgggatgggaacacagacctgctcct  
gcaggcgaaggcagaggagatggaagatccaaacctgaacccaaaacaccgtagaaaagaagagaagaagctcg  
aacagactacaggaaagtctcgtctgaagttggaggaaaccagtgagcgcgtctctgggtcagctgtggctggagct  
cctgctcttttacacacttgagtttgcctggaggagcacataatcagcatccgctcgaaggaaactgctgccgcga  
gagctgaaagaactggcctcggcgcagactcgtatagaggatccggttgcactgaaaaggaaactgctgctcagtc  
tgaacagtcagatggtgttcgagtagatccaggagcgttccgcacggcctacaagtagcttccgctgtccccagag  
caggaaacagagtgaacaccagccgcttactgaggaaacaacaccgactcaatgaaaccgcccgatccgacagc  
ctggagcgaagaaactgatgaagaggacggagacagcagtgatgaagatgaagagcgggatttggaggaaagag  
agagcctgagaggagcgttactgatctcctggtgggggacggtgggattgatggtgaaggtgtttctcaggaaat  
ctccagaacgctgtcctctctgttctgaacggcctgctgatggacagcagatgaagatgatgaggaagaggagaa  
gatcatgagatggaggaaacaggacaatatcgtccagaaagacctgcactacatctttgacaggatgatcttctg  
gaggaaagccgcaaacagctcgtgtgcagcatctgcaagcagatggacacctaaagacaaatgtcctgaagactt  
caagaagattgagctgaaacctctgcccgcctatgactgagctcttttagagaaatcctggactgctctgcatgctc  
tgctaccgtgagctatcggcagctctgctcagcagcagaagagagagcagattctgggtagctctggagcgtctca  
ttagaaaagagtacaacgataaggcccagctgtgtctgttccggttcttctaaqaatgggttttgggtttctgtagacag  
tgatctggacatctgtatgacactggaggccacagaccgcagagaagctgaactgtaaggagatcatagagggc  
ttagctaaagtgtgaagaaacacacaggtttaaggaatatcttgcctatcacaactgctaaagtgcctatagtga  
agtttgaacatagacagagcggactggaaggagacatcagcctctacaacacctggcccagcacaacacaaggat  
gctggccacatatgctgctatagatcctcgtgtgcagtatctgggctacactatgaaagtatttggcaagcgtgt  
gatattggcgatgectccagagggtctctcctcatatgcttacatcctcatggtgctctatttctcaccagcaga  
gacaaccaccagctatctccgctcttacaagagattttgatggaaacagactcctcagagaatggttagatggctg  
gaaactttcttcttctgatgacctcgatgagctgcccggcgtctcccagagctccatcagaatagagagacagtc  
ggggagctttggctggcctgctgcttctacaccgaggtttgattttaaagagcatgtgatctccatccggc  
agcgcaaacgctcaccacctcagagaagcagtgagctccaaatgcatcgcaatcgaagatccctttgacttgaa  
tcataatcttgggtgctggtgttctcgcaaaatgaccaacttcacatgaaaggccttcacacggcaggaaagctc  
ttcggcaccctgtttaccctcagcctggaacagaggccgattacttctttgactcaaaaggtgctgacggacggtg  
aactggctcctaagatcgtgctgctgcccgatctgtgggaagatcggctcactacatgaaggactgtcctaagagacg  
cagaatgaagaagaaggaacgagcgtgaggagggtcagagaggagaccgagccagagagagacgatgt  
ttcagtggtgacatgggacatgtcaggcgggactgtcccagctataaacacctccggcagagagcagcaccg  
gacctgtcctcatatggtgcccggatggcgagctctcagtcctcccattcctcaagctgcttcagtcaggga  
gagagttggagcgaacagacaacctctgaatgttctgatcacagtcagactcctccatattctcctcaagcgtct  
ccgtacagccagacatccgtgtctccgcagaacaccaagccttcacatcatcatcatcctcctccacaaaac  
cctcccagccaccgaggttccccagtgagctgccccttttcagcttccctcactctcaccgggccaatatca  
cggggtctgtcagcgtgggtctcctgcccgtcaaccgctcgtcctcgggctcctgcccattcagggcccc  
ctgctcagcccaccgctcagcactccaaattaccgtccagggtggaggaggtggcaatggaggagggcagg  
cggtaactctgaatgatcccagattattttctcagccggcagcggcggcaggacgggtggcagtaggcccgaga  
aagaggcaccctggcacaatcacctctgggtccaggccacttggggaaatggcaccgtgaataagccagat  
cctaatttcccagctcagtttgggtggtgaaatccggctctcagatcctgggatcagggcgggtgctgctcaatatt  
ccatttccatccttcatgcccactaccgctgctcctacactgcagcagcccaacaaaccttcatctcacaagg  
ttctgtggtggcaaatcaacattaccctcttattcaacacggctcgcacagcgaatctcaactacattcagcagaag  
aaa**TGA**

## Kamminga\_FigureS6

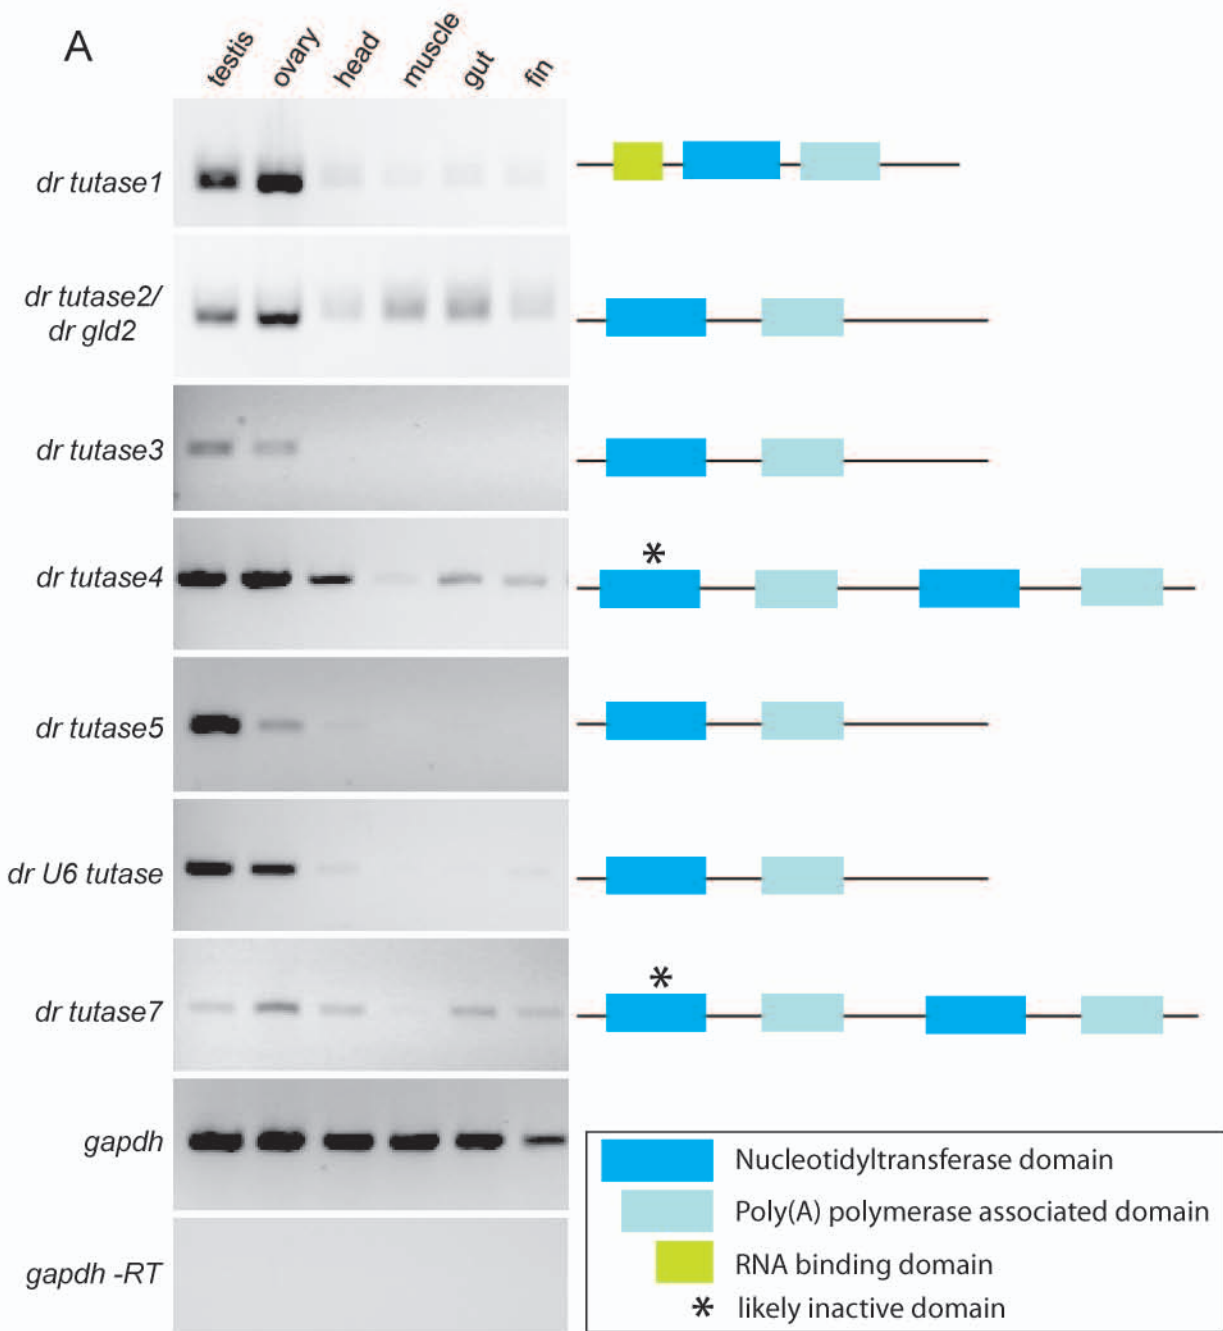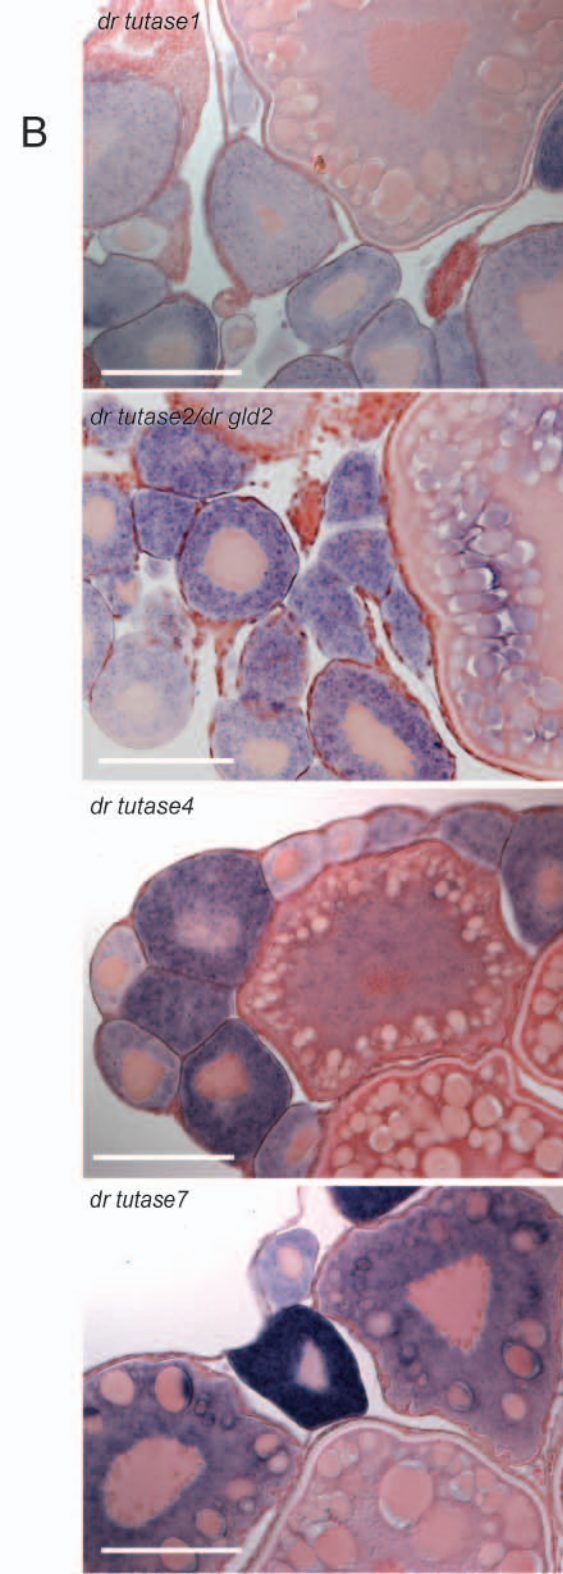

Kamminga\_Figure S7
